# Supplementary material for: Supraphysiologic control over HIV-1 replication mediated by CD8 T cells expressing a re-engineered CD4-based chimeric antigen receptor
Source: PubMed Central journal article supplement (PMC5638568; doi:10.1371/journal.ppat.1006613), 2017-10-12

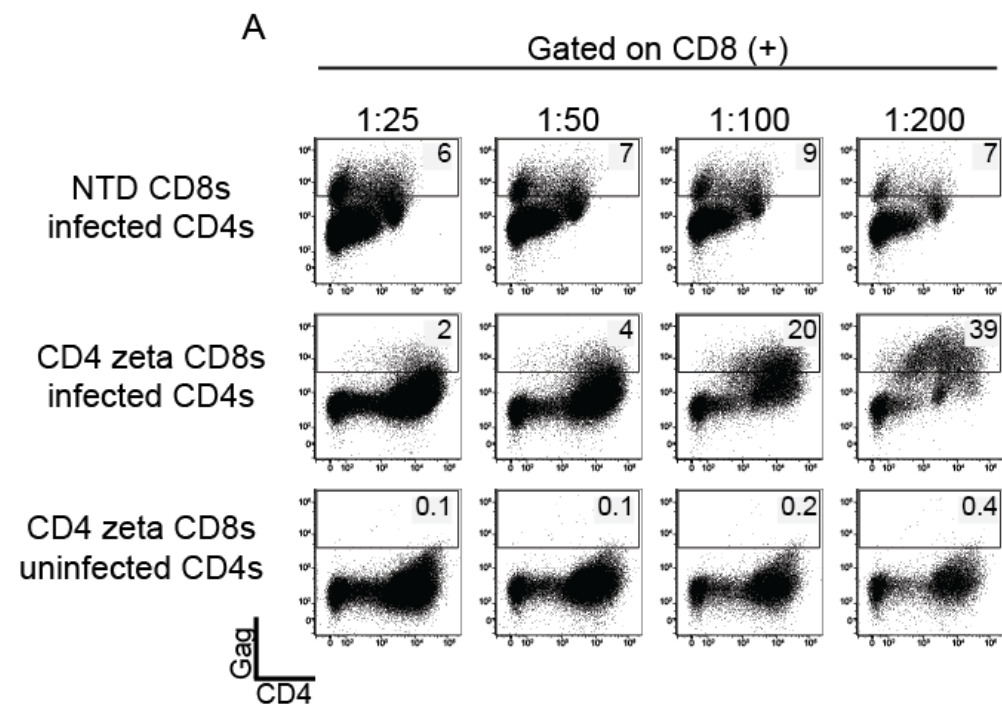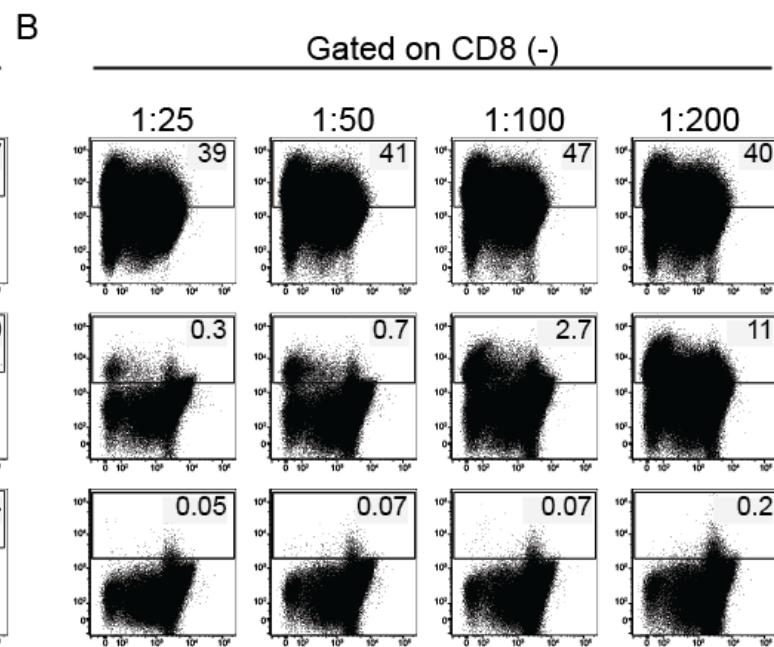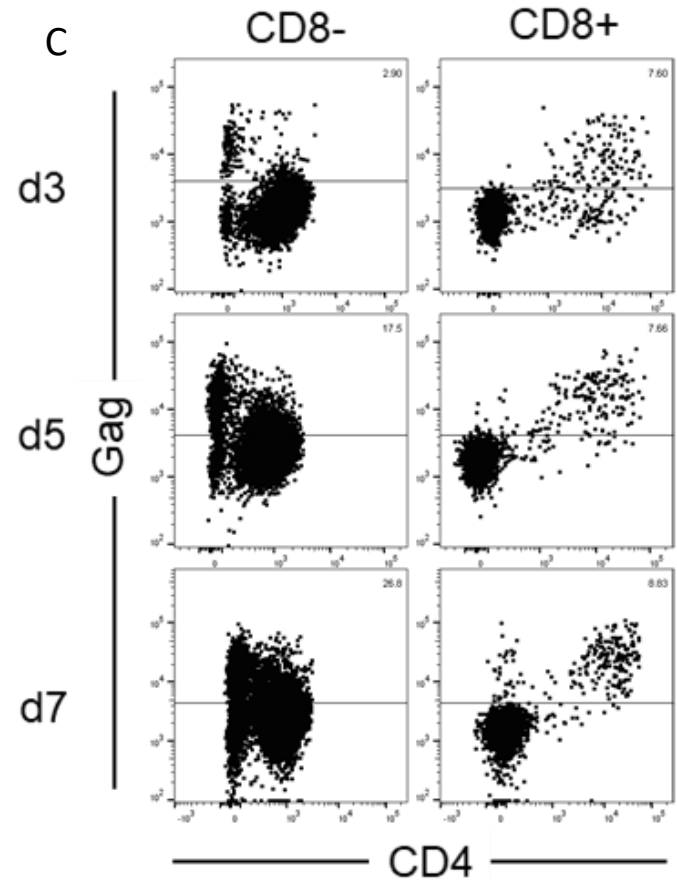

Supplement: ppat.1006613.s004.pdf [file ppat.1006613.s004.pdf]
